# Supplementary material for: Vine Cane Compounds to Prevent Skin Cells Aging through Solid Lipid Nanoparticles
Source: MDPI journal article supplement (doi:10.3390/pharmaceutics14020240), 2022-01-20
Supplement: s1 [file s1]

## Supplementary Material: Vine Cane Compounds to Prevent Skin Cells Aging through Solid Lipid Nanoparticles

**Adriana Pereira, Maria João Ramalho, Renata Silva, Vera Silva, Rita Marques-Oliveira, Ana Catarina Silva, Maria Carmo Pereira and Joana A. Loureiro**

**Table S1. Solid Lipid Screening**

| Solid li-<br>pid               | EGCG           |            |    |    |    | Resveratrol    |            |    |    |    | Myricetin      |            |    |    |    |
|--------------------------------|----------------|------------|----|----|----|----------------|------------|----|----|----|----------------|------------|----|----|----|
|                                | Ratio<br>(w/w) | Time (min) |    |    |    | Ratio<br>(w/w) | Time (min) |    |    |    | Ratio<br>(w/w) | Time (min) |    |    |    |
|                                |                | 15         | 30 | 45 | 60 |                | 15         | 30 | 45 | 60 |                | 15         | 30 | 45 | 60 |
| Gelucire®<br>50/13             | 1:100          | -          | -  | -  | -  | 1:100          | -          | -  | -  | -  | 1:100          | -          | -  | -  | -  |
| Com-<br>pritol®<br>H105<br>ATO | 1:100          | -          | -  | -  | -  | 1:200          | +          | +  | +  | -  | 1:100          | -          | -  | -  | -  |
| Softisan®<br>100               | 1:100          | -          | -  | -  | -  | 1:200          | +          | +  | +  | +  |                |            |    |    |    |
| Apifil®                        | 1:100          | +          | +  | +  | +  |                |            |    |    |    |                |            |    |    |    |
| Precirol®<br>5 ATO             | 1:100          | +          | +  | +  | +  |                |            |    |    |    |                |            |    |    |    |
| Witepsol®<br>E76               | 1:100          | +          | +  | +  | +  |                |            |    |    |    |                |            |    |    |    |

|                                |       |   |   |   |   |  |  |
|--------------------------------|-------|---|---|---|---|--|--|
| <b>Suppocire DM Pel-lets</b>   | 1:100 | + | + | + | + |  |  |
| <b>Suppocire NA15 pel-lets</b> | 1:100 | + | + | + | + |  |  |
| <b>Gelucire 39/01</b>          | 1:100 | + | + | + | + |  |  |
| <b>Gelucire® 43/01</b>         | 1:100 | + | + | + | + |  |  |
| <b>Cetyl palmitate</b>         | 1:100 | + | + | + | + |  |  |
| <b>Stearic acid</b>            | 1:100 | + | + | + | + |  |  |
| <b>Dynasan® 118</b>            | 1:100 | + | + | + | + |  |  |
| <b>Glyceryl monos-tearate</b>  | 1:100 | + | + | + | + |  |  |
| <b>Softisan® 154</b>           | 1:100 | + | + | + | + |  |  |

**Table S2.** Ultra-Turrax and ultrasonication times tested for Gelucire® 50/13 and Pluronic F-127, and the formulation characteristics (size, zeta potential (ZP) and PdI).

| SLN: Gelucire® 50/13 + pluronic-F127 |                                       |     |   |
|--------------------------------------|---------------------------------------|-----|---|
| S (min)                              | UT(min)                               | 0,5 | 2 |
| 5                                    | Consistency and colour not acceptable | -   |   |
| 15                                   | Consistency and colour not acceptable | -   |   |
| 30                                   | Consistency and colour not acceptable | -   |   |

**Table S3.** Ultra-Turrax and ultrasonication times tested for Gelucire® 50/13 and Tween 80, and the formulation characteristics (size, zeta potential (ZP) and PdI).

| SLN: Gelucire® 50/13 + Tween 80 |         |                                       |                                       |
|---------------------------------|---------|---------------------------------------|---------------------------------------|
| S (min)                         | UT(min) | 0,5                                   | 2                                     |
| 5                               |         | Consistency and colour not acceptable | -                                     |
| 15                              |         | -                                     | -                                     |
| 30                              |         | Consistency and colour not acceptable | Consistency and colour not acceptable |

**Table S4.** Ultra-Turrax and ultrasonication times tested for Compritol® HD5 ATO and Pluronic F-127, and the formulation characteristics (size, zeta potential (ZP) and PdI).

| SLN: Compritol® HD5 ATO + pluronic-F127 |         |                                                                                     |                                                                                   |
|-----------------------------------------|---------|-------------------------------------------------------------------------------------|-----------------------------------------------------------------------------------|
| S (min)                                 | UT(min) | 0,5                                                                                 | 2                                                                                 |
| 5                                       |         | <b>Size:</b> 83%- 716 nm and 16%- 138 nm<br><b>PdI:</b> 0,409<br><b>ZP:</b> -0,6 mV | <b>Size:</b> 350 ± 17 nm<br><b>PdI:</b> 0,353 ± 0,007<br><b>ZP:</b> -0,4 ± 0,3 mV |
| 15                                      |         | -                                                                                   | <b>Size:</b> 206 ± 5 nm<br><b>PdI:</b> 0,21 ± 0,01<br><b>ZP:</b> -1,9 ± 0,4 mV    |
| 30                                      |         | <b>Size:</b> 315 ± 10 nm<br><b>PdI:</b> 0,434 ± 0,003<br><b>ZP:</b> -0,5 ± 0,1 mV   | <b>Size:</b> 96 ± 33 nm<br><b>PdI:</b> 0,307 ± 0,004<br><b>ZP:</b> -1,7 ± 0,7 mV  |

**Table S5.** Ultra-Turrax and ultrasonication times tested for Compritol® HD5 ATO and Tween 80, and the formulation characteristics (size, zeta potential (ZP) and PdI).

| SLN: Compritol® HD5 ATO + tween 80 |  |  |  |
|------------------------------------|--|--|--|
|------------------------------------|--|--|--|

| S (min) | UT(min) | 0,5                                                                                                                | 2          |
|---------|---------|--------------------------------------------------------------------------------------------------------------------|------------|
|         |         | <b>Size:</b> 81,5%- 1844 nm and 18,5%- 90 nm<br><b>PdI:</b> 0,631<br><b>ZP:</b> 37,1%-(-13,1) mV and 62,9%-14,8 mV | -          |
| 5       |         |                                                                                                                    | -          |
| 15      |         | -                                                                                                                  | Solidified |
| 30      |         | <b>Size:</b> 92,2%- 2025 nm and 7,8%- 63 nm<br><b>PdI:</b> 0,560<br><b>ZP:</b> -6,39 mV                            | Solidified |

Solid lipid screening for EGCG in a 1:100 ratio: i) compritol HD5 ATO and  
ii) Glyceryl monostearate

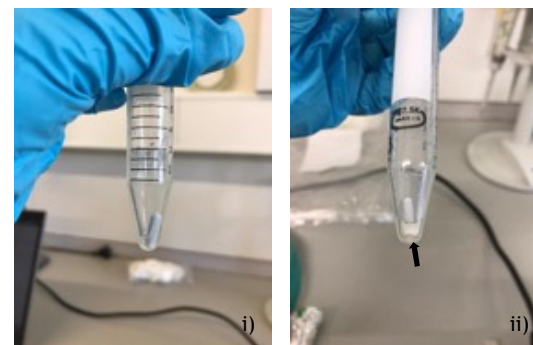

Solid lipid screening for Resveratrol in a 1:200 ratio: i) compritol HD5 ATO and ii) softisan 100

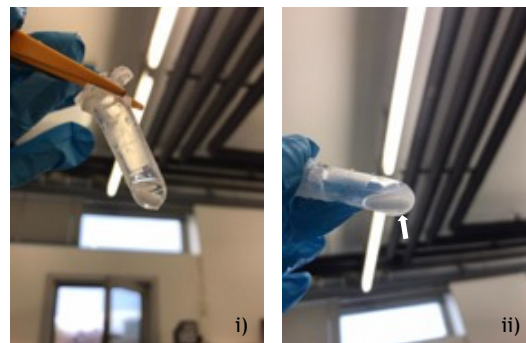

Solid lipid screening for myricetin in a 1:100 ratio: i) compritol HD5 ATO. All the tested solid lipids were compatible with this natural compound

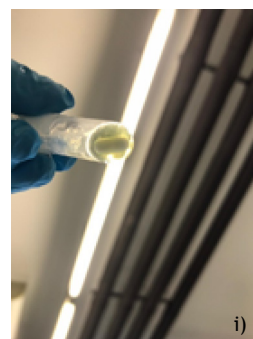

**Figure S1.** Examples of lipids that were able to solubilize the NC (i), while the (ii) figures are representatives of the ones that could not solubilize the NC, since compound crystals can be visualized.

| Lipids / Conditions                    | NC   | Melted                                                                               | After cooling down                                                                   |
|----------------------------------------|------|--------------------------------------------------------------------------------------|--------------------------------------------------------------------------------------|
| Gelucire 50/13; 15 min; ratio 1:100    | EGCG | 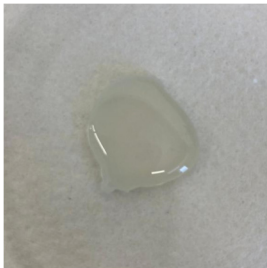  |   |
| Compritol HD5 ATO; 15 min; ratio 1:100 |      |   |   |
| Softisan 100; 15 min; ratio 1:100      |      |  |  |

|                                        |             |                                                                                       |                                                                                       |
|----------------------------------------|-------------|---------------------------------------------------------------------------------------|---------------------------------------------------------------------------------------|
| Gelucire 50/13; 15 min; ratio 1:100    | Resveratrol |    |    |
| Compritol HD5 ATO; 60 min; ratio 1:200 |             |    |    |
| Gelucire 50/13; 15 min; ratio 1:100    | Myricetin   |   |   |
| Compritol HD5 ATO; 15 min; ratio 1:100 |             |  |  |

**Figure S2.** Images of the lipids that solubilized the NC, after melting and after cooling down.

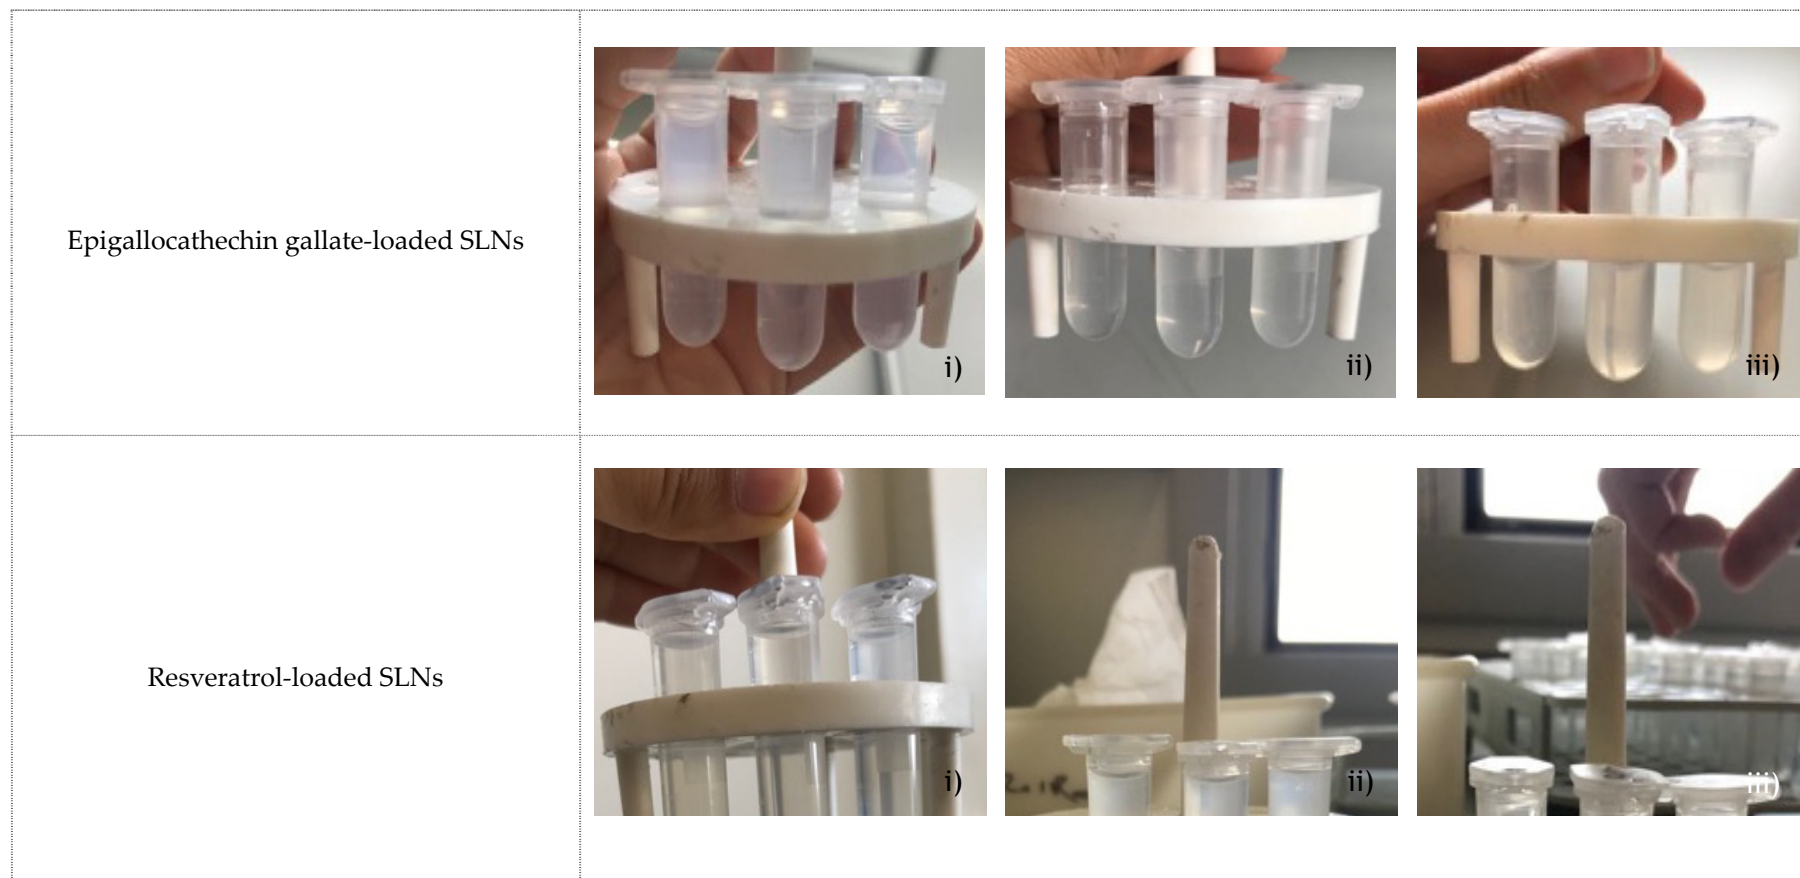

**Figure S3.** Images of the samples before and after the first and second centrifugation included in the accelerated stability study assays before centrifugation (i); after the first centrifugation (30 minutes) (ii); and after the second centrifugation (30 minutes + 30 minutes) (iii).
